# Supplementary material
Source: PubMed Central journal article supplement (PMC7047098)
Supplement: Supp_Fig1.pdf [file Supp_Fig1.pdf]

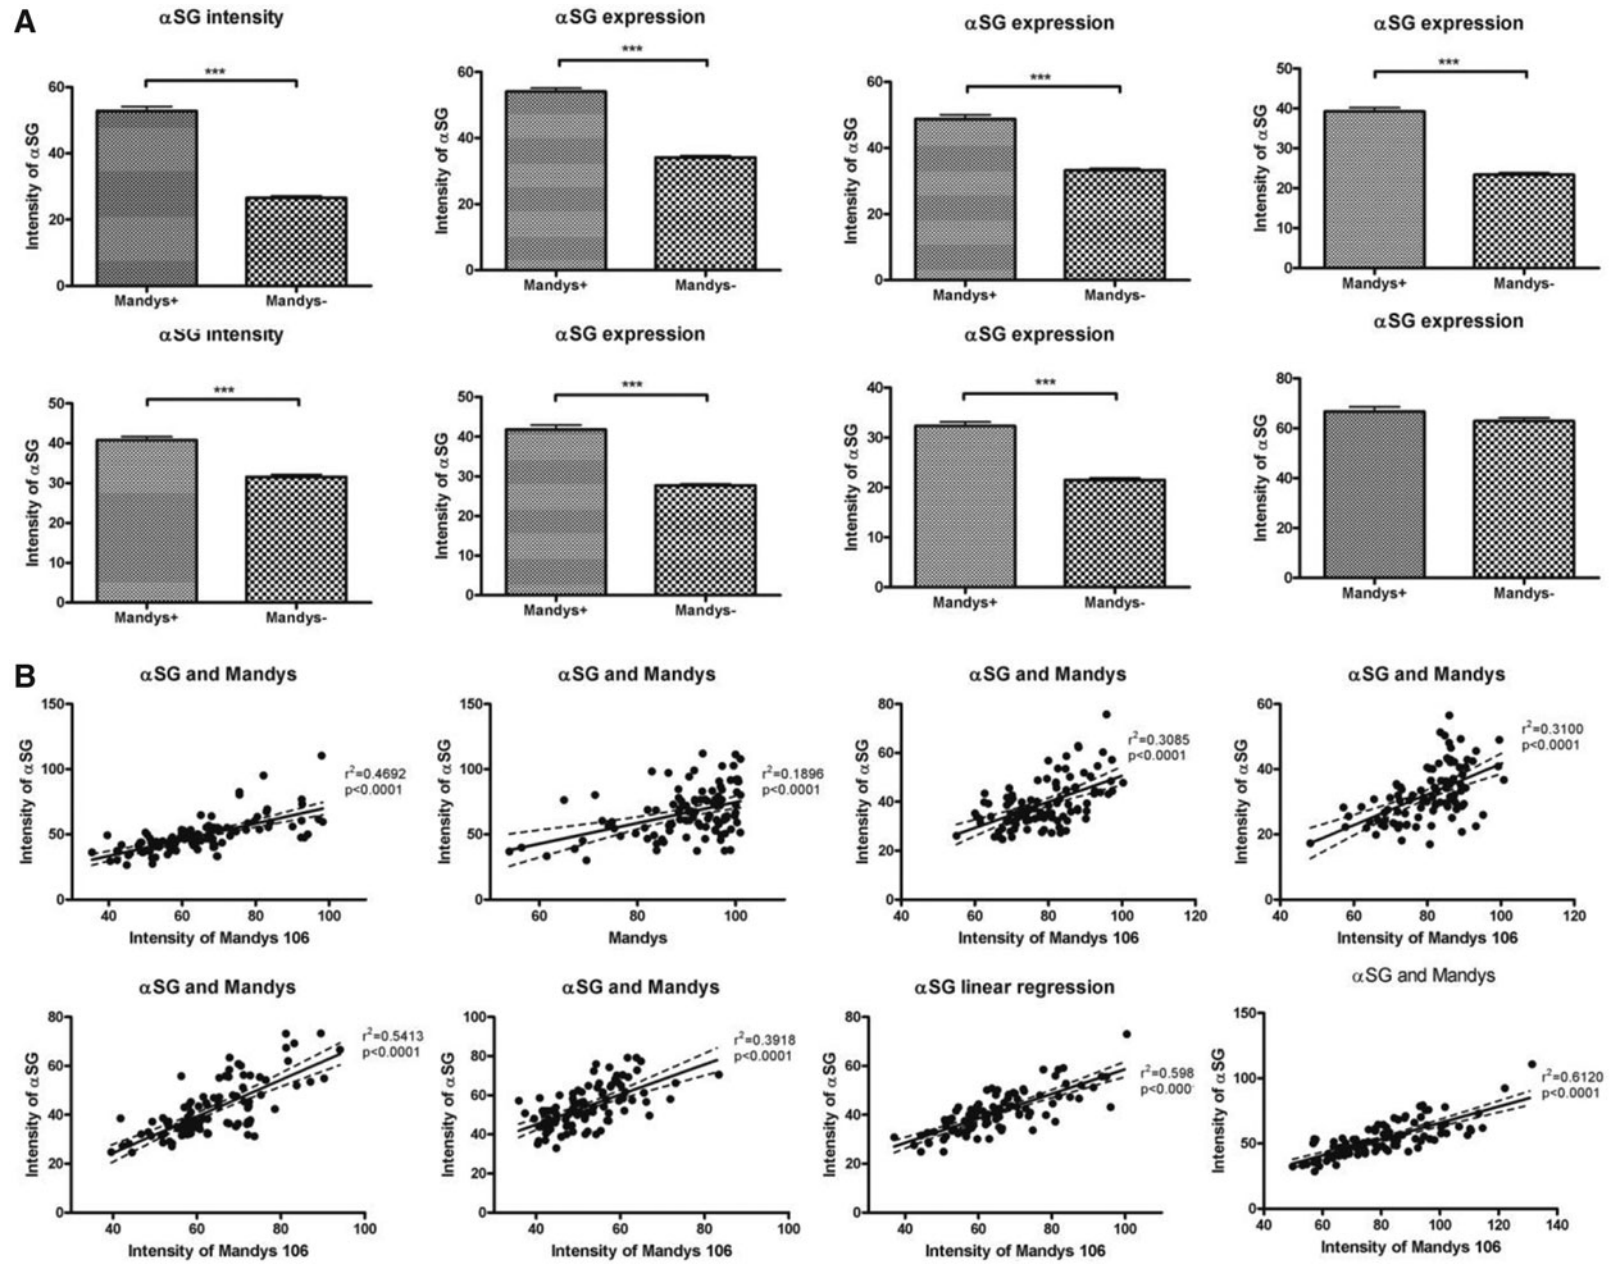

**Supplementary Figure S1.** Quantification of the intensity of  $\alpha$ -sarcoglycan in dystrophin<sup>+</sup> and dystrophin<sup>-</sup> fibers in transverse sections of each transplanted muscle (**A**). Linear regression analysis of the intensity of the  $\alpha$ -sarcoglycan and dystrophin shows a positive correlation between the two proteins on donor-derived muscle fibers in all the transplanted muscles (**B**). \*\*\* $p < 0.001$ .
