# Supplementary material
Source: PubMed Central journal article supplement (PMC7047098)
Supplement: Supp_Fig3.pdf [file Supp_Fig3.pdf]

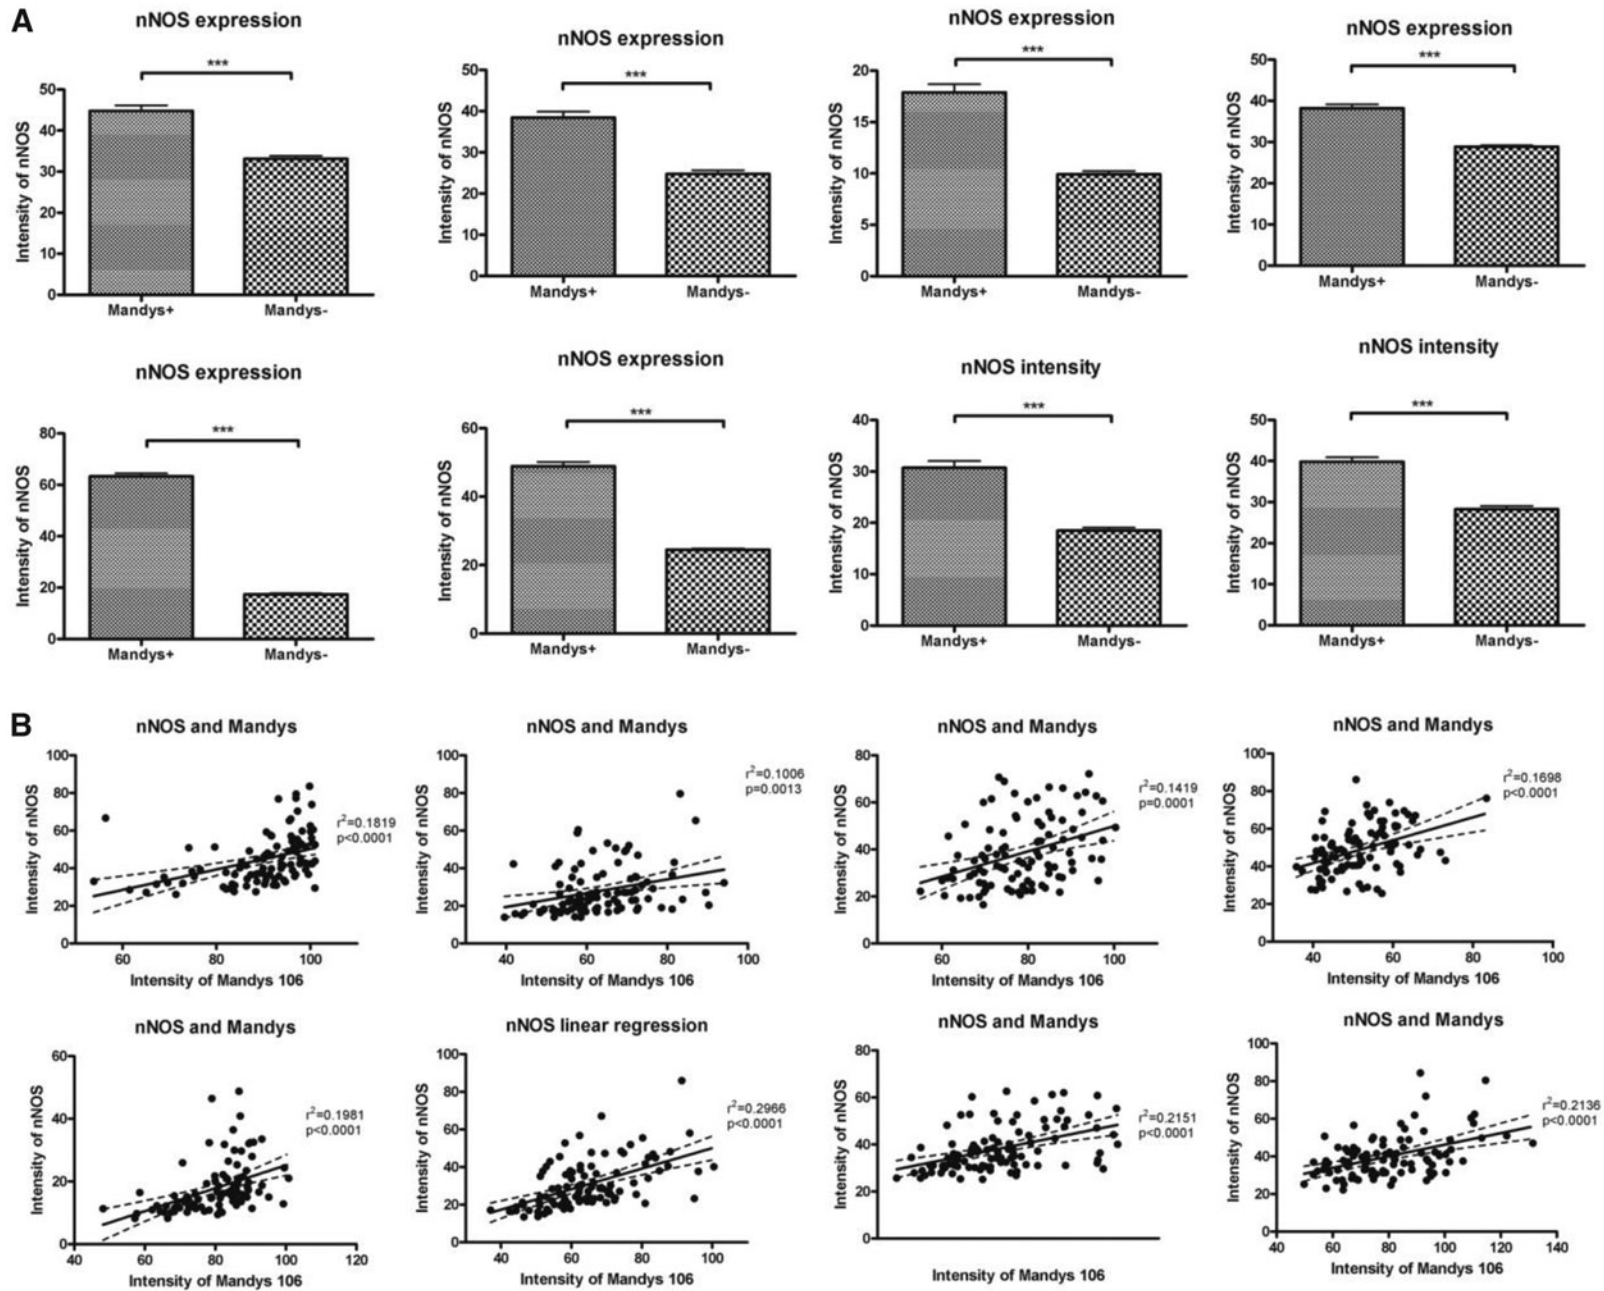

**Supplementary Figure S3.** Quantification of the intensity of nNOS in dystrophin<sup>+</sup> and dystrophin<sup>-</sup> fibers in transverse sections of each transplanted muscle (A). Linear regression analysis of the intensity of the nNOS and dystrophin shows a positive correlation between the two proteins on donor-derived muscle fibers in all the transplanted muscles (B). \*\*\* $p < 0.001$ .
