# Supplementary material
Source: PubMed Central journal article supplement (PMC7047098)

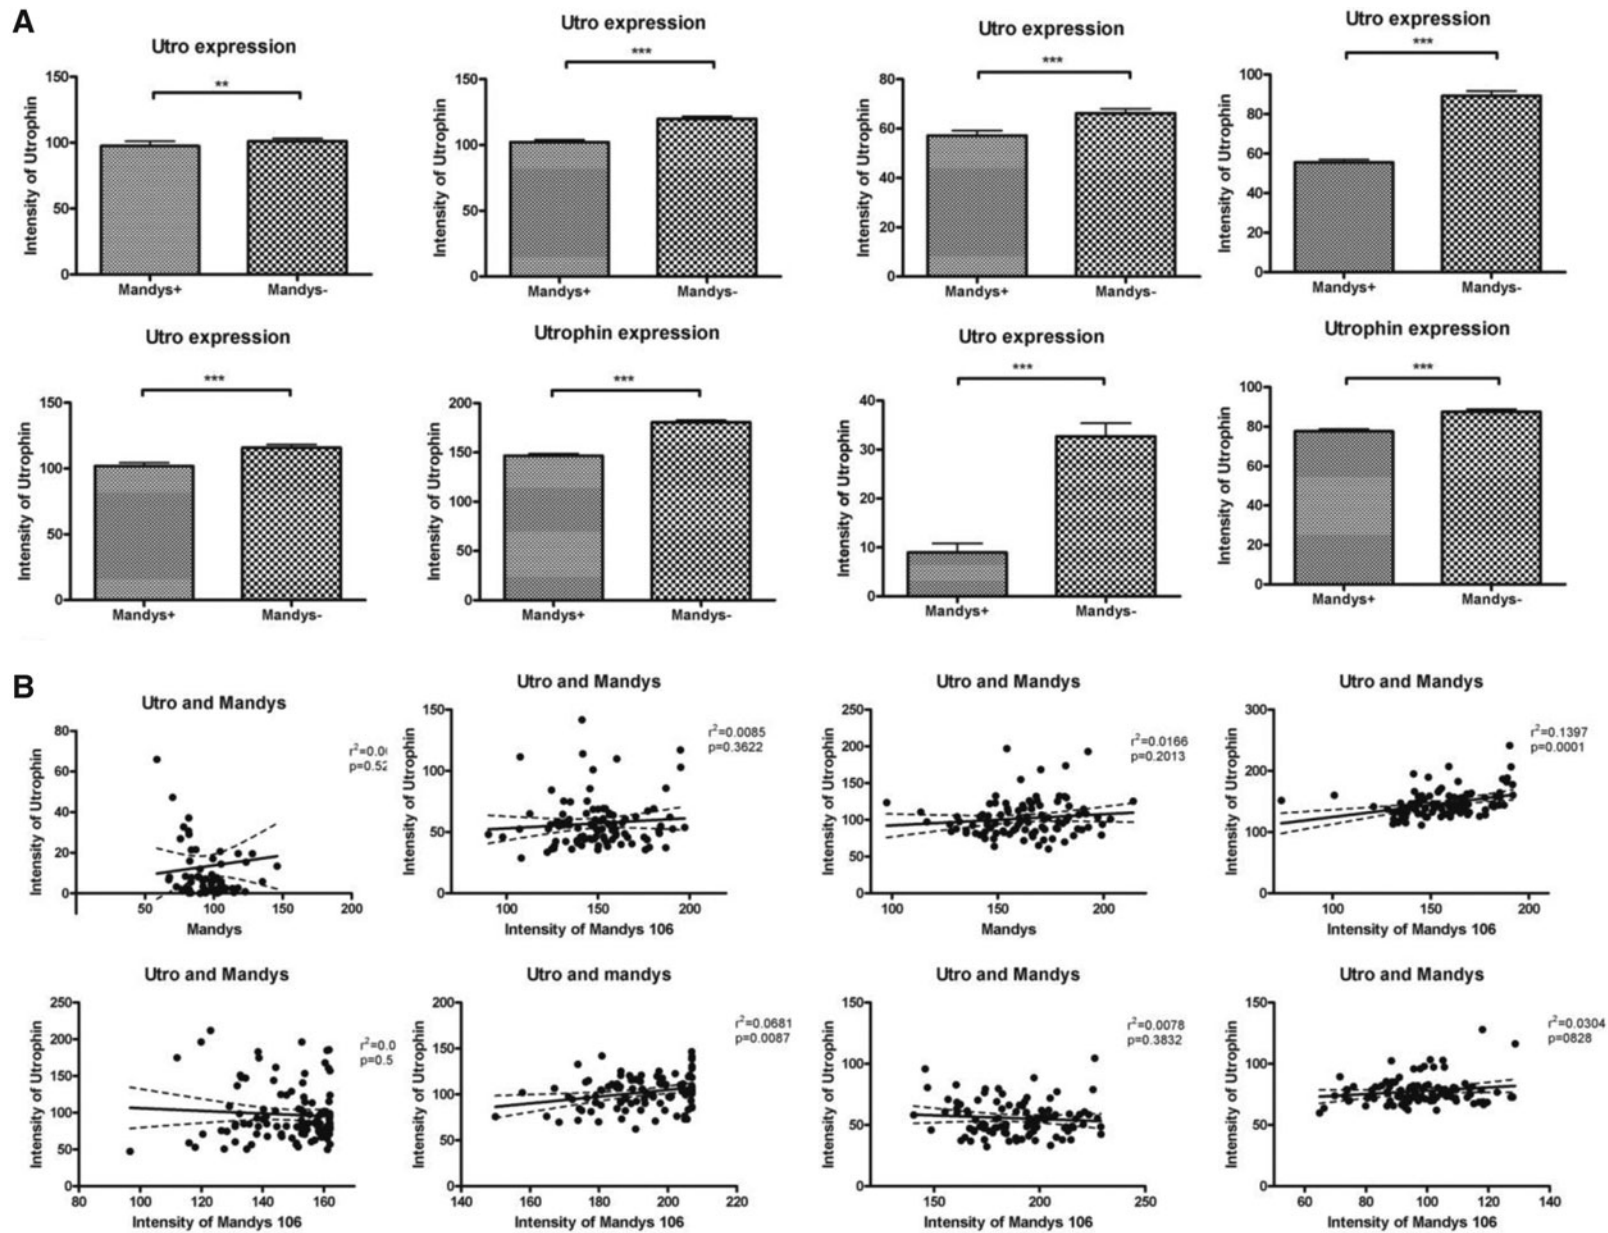

Supplement: Supp_Fig4.pdf [file Supp_Fig4.pdf]
